# Supplementary material for: Outcomes of pediatric severe traumatic brain injury patients treated in adult trauma centers with and without added qualifications in pediatrics — United States, 2009
Source: PubMed Central journal article supplement (PMC5005579; doi:10.1186/2197-1714-1-15), 2014-06-02
Supplement: 40621_2014_15_MOESM1_ESM.pdf [file 40621_2014_15_MOESM1_ESM.pdf]

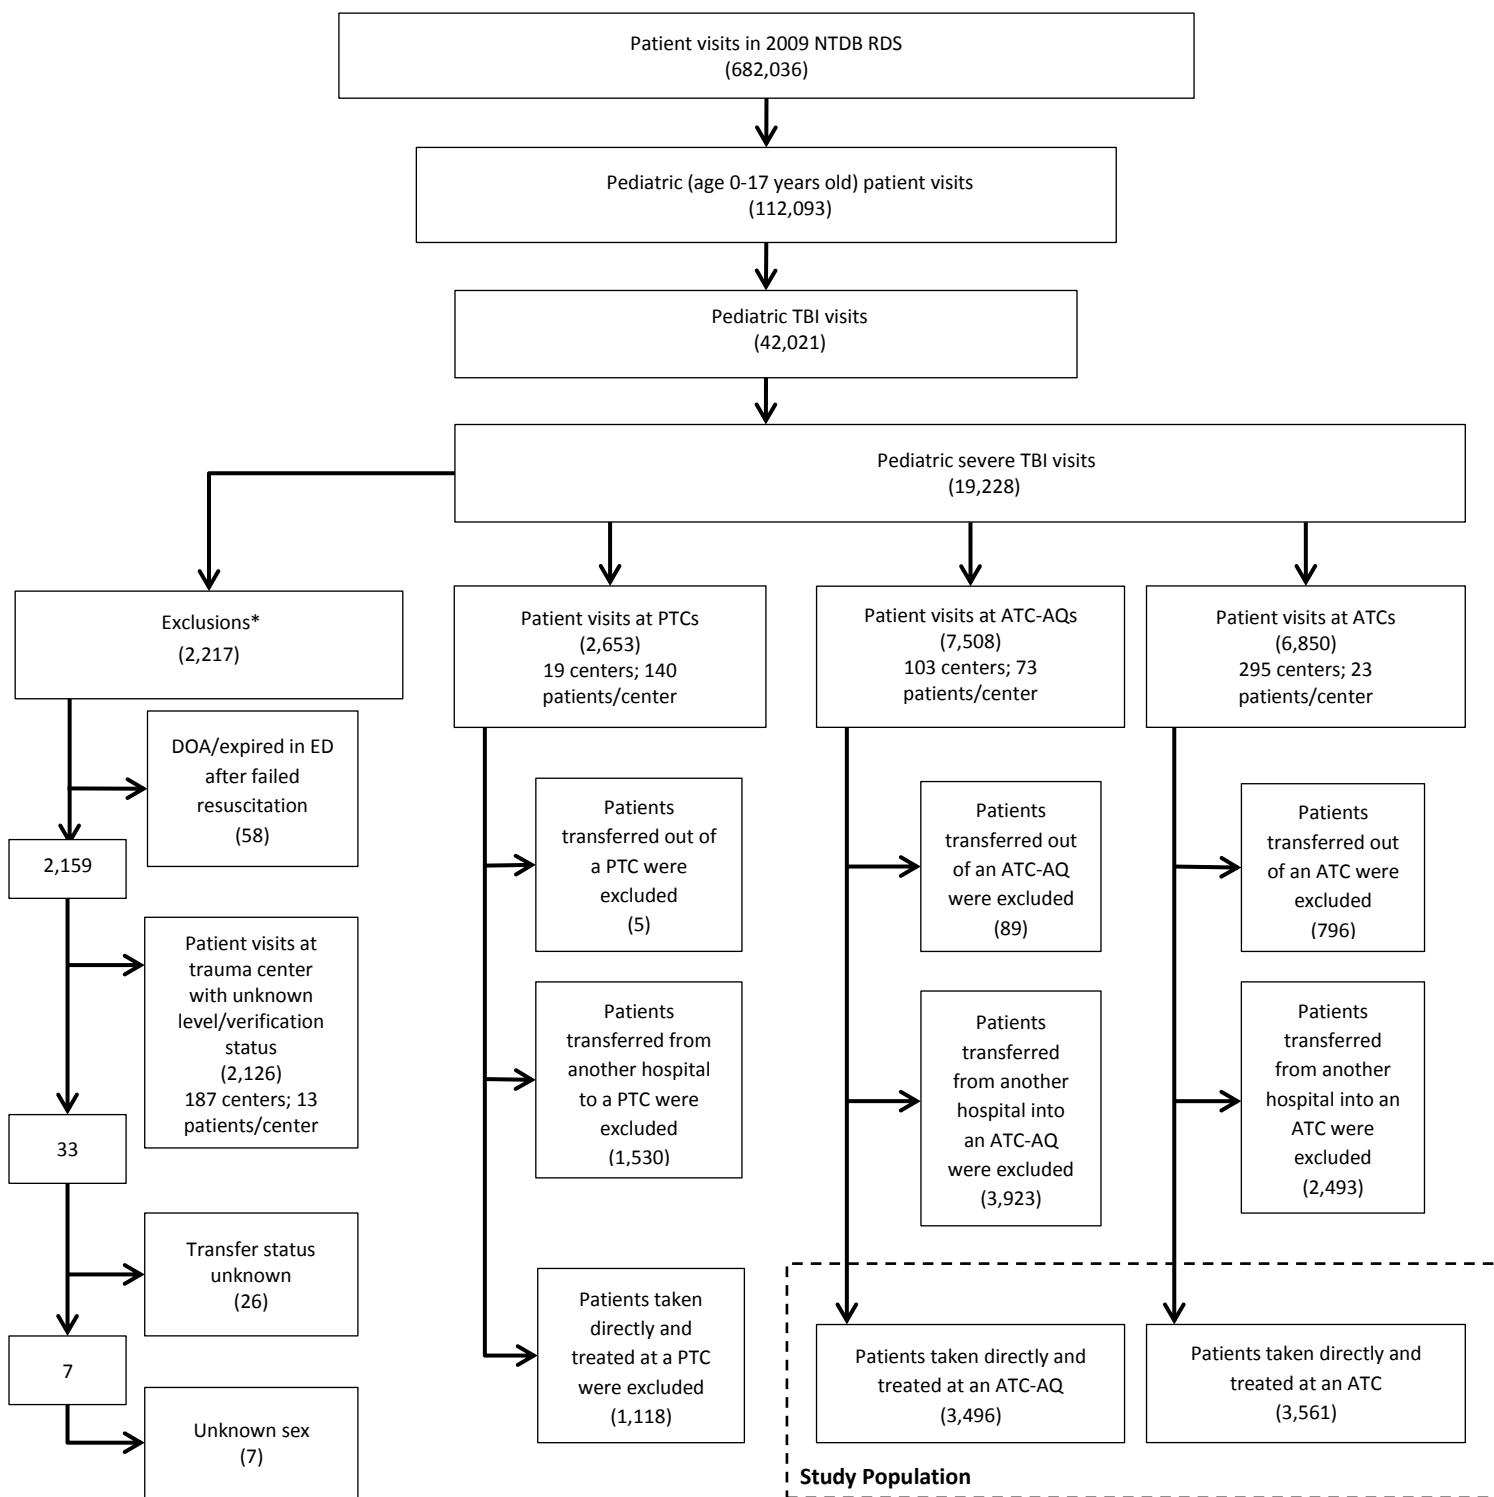

\*Subsets of Exclusions are mutually exclusive
